# Supplementary material for: Polyoxometalate (POM)-based, multi-functional, inorganic–organic, hybrid compounds: syntheses and molecular structures of silanol- and/or siloxane bond-containing species grafted on mono- and tri-lacunary Keggin POMs
Source: Royal Society of Chemistry journal article supplement (doi:10.1039/c0dt01185a), 2010-12-22
Supplement: c0dt01185a.pdf [file c0dt01185a.pdf]

**Electronic Supplementary Information (ESI)** Ver. 1.06 (10-9-7)

Ver. 1.01 (10-5-17)

**Polyoxometalate (POM)-based, multi-functional, inorganic-organic  
hybrid compounds: syntheses and molecular structures of silanol-  
and/or siloxane bond-containing species grafted on mono- and  
tri-lacunary Keggin POMs†**

Shotaro Aoki, Takayuki Kurashina, Yuhki Kasahara, Tadashi Nishijima and Kenji  
Nomiya\*

*Department of Materials Science, Faculty of Science, Kanagawa University,*

*Hiratsuka, Kanagawa 259-1293, Japan*

**Contents:**

**Synthesis of the POM precursors**

**Table S1** Bond lengths (Å) and angles (°) for **1**

**Table S2** Bond lengths (Å) and angles (°) for **3a**

### Synthesis of the POM precursors

**K<sub>7</sub>[α-PW<sub>11</sub>O<sub>39</sub>]·13H<sub>2</sub>O.** The colorless clear solution of Na<sub>3</sub>[α-PW<sub>12</sub>O<sub>40</sub>]·13H<sub>2</sub>O (20.0 g (6.29 mmol)) dissolved in 300 mL of water was adjusted to pH = 4.9 by adding a solid of Na<sub>2</sub>CO<sub>3</sub> with a small portion, whereinto a solid KCl (50.0 g (0.67 mol)) was added, followed by heating with a water bath at 90 °C. The resulting colorless clear solution was cooled to room temperature and allowed to stand overnight in a refrigerator at 4 °C. White powder formed was collected on a glass filter (G 3.5) and dried *in vacuo* for 2 h. The white powder, obtained in 91.5 % yield (18.3 g scale), was soluble in water, and insoluble in methanol, ethanol, acetonitrile, acetone, dimethyl sulfoxide. TG/DTA under atmospheric conditions: a weight loss of 7.35 % was observed at below 493.8 °C with an endothermic point at 60.5 °C based on dehydration; calcd 7.35 % for x = 13 in K<sub>7</sub>[α-PW<sub>11</sub>O<sub>39</sub>]·xH<sub>2</sub>O. FTIR (KBr): 1622s, 1085s, 1041s, 950vs, 898s, 859vs, 807vs, 732vs, 592m, 509m, 433w, 410m cm<sup>-1</sup>. <sup>31</sup>P NMR (22.4 °C, D<sub>2</sub>O): δ -10.77.

**Na<sub>3</sub>[α-PW<sub>12</sub>O<sub>40</sub>]·13H<sub>2</sub>O.** The procedure is based on the classic literature.<sup>S1</sup> To the colorless clear solution of Na<sub>2</sub>WO<sub>4</sub>·2H<sub>2</sub>O (100 g (0.30 mol)) dissolved in 160 mL of water was added solid Na<sub>2</sub>HPO<sub>4</sub>·2H<sub>2</sub>O (50.0 g (0.28 mol)). The solution was heated in a water bath at 80 °C for 4 h. To the solution, 163 mL of 7.3 M aqueous HCl solution was slowly added, followed by stirring for 30 min in a water bath at 80 °C. The colorless solution was changed to pale yellow, and crystalline white powder was formed.

The solution was concentrated to *ca.* 200 mL of volume with a rotary evaporator at 50 °C. After cooling to room temperature, crystalline powder formed was collected on a glass filter (G 4), which was re-dissolved in 150 mL of water with a water bath at over 90 °C. The colorless clear solution was cooled to room temperature and allowed to stand overnight in a refrigerator at 4 °C. Crystalline white powder formed was collected on a glass filter (G 4) and dried in *vacuo* for 2h. Yield was 80.6 % (64.1 g scale). The white powder was soluble in water and acetone. TG/DTA under atmospheric conditions: a weight loss of 7.32 % was observed at below 492.9 °C with endothermic points at 73.4 and 212.5 °C, based on dehydration; calcd 7.37 % for  $x = 13$  in  $\text{Na}_3[\alpha\text{-PW}_{12}\text{O}_{40}] \cdot x\text{H}_2\text{O}$ . FTIR (KBr): 1616m, 1080vs, 982vs, 894s, 800vs, 596m, 525s, 427w  $\text{cm}^{-1}$ .  $^{31}\text{P}$  NMR (23.8 °C,  $\text{D}_2\text{O}$ ):  $\delta$  -15.04.

## References

S1 A. Rosenheim and J. Jaenicke, *Z. Anorg. Allg. Chem.*, 1917, **101**, 251.

**Table S1** Bond lengths (Å) and angles (°) for **1**

|                                                           |           |             |           |
|-----------------------------------------------------------|-----------|-------------|-----------|
| W-O <sub>t</sub> (O <sub>t</sub> : terminal oxygen)       |           |             |           |
| W(1)-O(1)                                                 | 1.665(13) | W(7)-O(23)  | 1.676(14) |
| W(2)-O(3)                                                 | 1.657(14) | W(8)-O(25)  | 1.692(12) |
| W(3)-O(5)                                                 | 1.673(14) | W(9)-O(27)  | 1.666(14) |
| W(4)-O(17)                                                | 1.686(12) | W(10)-O(37) | 1.655(13) |
| W(5)-O(19)                                                | 1.667(14) | W(11)-O(39) | 1.648(15) |
| W(6)-O(21)                                                | 1.659(14) |             |           |
| average = 1.668 [1.648(15)-1.692(12)]                     |           |             |           |
| W-O <sub>e</sub> (O <sub>e</sub> : edge sharing oxygen)   |           |             |           |
| W(1)-O(2)                                                 | 1.883(14) | W(5)-O(18)  | 1.877(14) |
| W(1)-O(6)                                                 | 1.893(13) | W(6)-O(22)  | 1.942(14) |
| W(2)-O(2)                                                 | 1.898(14) | W(7)-O(22)  | 1.855(15) |
| W(2)-O(4)                                                 | 1.925(14) | W(8)-O(26)  | 1.882(13) |
| W(3)-O(4)                                                 | 1.889(15) | W(9)-O(26)  | 1.908(13) |
| W(3)-O(6)                                                 | 1.886(14) | W(10)-O(31) | 1.891(15) |
| W(4)-O(18)                                                | 1.904(14) | W(11)-O(34) | 1.889(13) |
| average = 1.894 [1.855(15)-1.942(14)]                     |           |             |           |
| W-O <sub>c</sub> (O <sub>c</sub> : corner sharing oxygen) |           |             |           |
| W(1)-O(8)                                                 | 1.897(13) | W(7)-O(11)  | 1.884(14) |
| W(1)-O(13)                                                | 1.882(14) | W(7)-O(24)  | 1.894(15) |
| W(2)-O(9)                                                 | 1.905(13) | W(7)-O(32)  | 1.892(13) |
| W(2)-O(10)                                                | 1.874(14) | W(8)-O(12)  | 1.877(14) |
| W(3)-O(11)                                                | 1.899(14) | W(8)-O(24)  | 1.876(15) |
| W(3)-O(12)                                                | 1.885(15) | W(8)-O(33)  | 1.882(13) |
| W(4)-O(8)                                                 | 1.871(13) | W(9)-O(13)  | 1.886(13) |
| W(4)-O(28)                                                | 1.902(13) | W(9)-O(28)  | 1.901(12) |
| W(4)-O(29)                                                | 1.868(13) | W(9)-O(34)  | 1.880(13) |
| W(5)-O(9)                                                 | 1.877(13) | W(10)-O(32) | 1.886(13) |
| W(5)-O(20)                                                | 1.914(13) | W(10)-O(36) | 1.865(13) |
| W(5)-O(30)                                                | 1.870(14) | W(10)-O(38) | 1.851(14) |
| W(6)-O(10)                                                | 1.908(14) | W(11)-O(33) | 1.904(12) |

**Table S1** continued

|                                                  |           |                                       |           |
|--------------------------------------------------|-----------|---------------------------------------|-----------|
| W(6)-O(20)                                       | 1.878(13) | W(11)-O(38)                           | 1.885(14) |
| W(6)-O(31)                                       | 1.875(14) | W(11)-O(40)                           | 1.867(13) |
| average = 1.885 [1.851(14)-1.914(13)]            |           |                                       |           |
| W-O <sub>a</sub> (oxygen coordinating to P atom) |           |                                       |           |
| W(1)-O(7A)                                       | 2.48(3)   | W(1)-O(15B)                           | 2.60(3)   |
| W(2)-O(7A)                                       | 2.44(2)   | W(2)-O(16B)                           | 2.61(3)   |
| W(3)-O(7A)                                       | 2.41(2)   | W(3)-O(14B)                           | 2.47(3)   |
| W(4)-O(14A)                                      | 2.41(2)   | W(4)-O(15B)                           | 2.44(3)   |
| W(5)-O(14A)                                      | 2.35(2)   | W(5)-O(16B)                           | 2.44(3)   |
| W(6)-O(15A)                                      | 2.40(2)   | W(6)-O(16B)                           | 2.52(3)   |
| W(7)-O(15A)                                      | 2.49(2)   | W(7)-O(14B)                           | 2.47(3)   |
| W(8)-O(16A)                                      | 2.52(2)   | W(8)-O(14B)                           | 2.44(3)   |
| W(9)-O(16A)                                      | 2.48(2)   | W(9)-O(15B)                           | 2.40(3)   |
| W(10)-O(15A)                                     | 2.51(2)   | W(10)-O(7B)                           | 2.42(3)   |
| W(11)-O(16A)                                     | 2.46(2)   | W(11)-O(7B)                           | 2.31(3)   |
| average = 2.46 [2.31(3)-2.61(3)]                 |           |                                       |           |
| P-O                                              |           |                                       |           |
| P(1)-O(7A)                                       | 1.59(2)   | P(1)-O(7B)                            | 1.60(3)   |
| P(1)-O(14A)                                      | 1.55(2)   | P(1)-O(14B)                           | 1.56(3)   |
| P(1)-O(15A)                                      | 1.54(2)   | P(1)-O(15B)                           | 1.53(3)   |
| P(1)-O(16A)                                      | 1.49(2)   | P(1)-O(16B)                           | 1.45(3)   |
| average = 1.54 [1.49(2)-1.59(2)]                 |           | average = 1.54 [1.45(3)-1.60(3)]      |           |
| O-P-O                                            |           |                                       |           |
| O(14A)-P(1)-O(7A)                                | 106.2(12) | O(14B)-P(1)-O(7B)                     | 105.4(15) |
| O(15A)-P(1)-O(7A)                                | 104.6(12) | O(15B)-P(1)-O(7B)                     | 105.4(15) |
| O(15A)-P(1)-O(14A)                               | 109.9(12) | O(15B)-P(1)-O(14B)                    | 108.2(14) |
| O(16A)-P(1)-O(7A)                                | 108.4(12) | O(16B)-P(1)-O(7B)                     | 110.2(15) |
| O(16A)-P(1)-O(14A)                               | 112.6(12) | O(16B)-P(1)-O(14B)                    | 112.1(16) |
| O(16A)-P(1)-O(15A)                               | 114.5(12) | O(16B)-P(1)-O(15B)                    | 115.0(16) |
| average = 109.4 [104.6(12)-114.5(12)]            |           | average = 109.4 [105.4(15)-115.0(16)] |           |

**Table S2** Bond lengths (Å) and angles (°) for **3a**

|                                                           |            |                             |            |
|-----------------------------------------------------------|------------|-----------------------------|------------|
| W-O <sub>t</sub> (O <sub>t</sub> : terminal oxygen)       |            |                             |            |
| W(1)-O(1)                                                 | 1.709(3)   | W(3)-O(7)                   | 1.707(4)   |
| W(2)-O(6)                                                 | 1.703(3)   |                             |            |
| average = 1.706 [1.703(3)-1.709(3)]                       |            |                             |            |
| W-O <sub>e</sub> (O <sub>e</sub> : edge sharing oxygen)   |            |                             |            |
| W(1)-O(2)                                                 | 1.911(3)   | W(2)-O(10) <sup>ii</sup>    | 1.940(3)   |
| W(1)-O(2) <sup>i</sup>                                    | 1.928(3)   | W(3)-O(10)                  | 1.894(3)   |
| average = 1.918 [1.894(3)-1.940(3)]                       |            |                             |            |
| W-O <sub>c</sub> (O <sub>c</sub> : corner sharing oxygen) |            |                             |            |
| W(1)-O(4)                                                 | 1.901(3)   | W(3)-O(5)                   | 1.900(3)   |
| W(1)-O(5)                                                 | 1.918(3)   | W(3)-O(9)                   | 1.934(3)   |
| W(2)-O(4)                                                 | 1.917(3)   | W(3)-O(12)                  | 1.913(4)   |
| W(2)-O(9)                                                 | 1.871(3)   |                             |            |
| W(2)-O(11)                                                | 1.915(3)   |                             |            |
| average = 1.909 [1.871(3)-1.934(3)]                       |            |                             |            |
| W-O <sub>a</sub> (oxygen coordinating to P atom)          |            |                             |            |
| W(1)-O(3)                                                 | 2.384(3)   | W(3)-O(8) <sup>i</sup>      | 2.370(3)   |
| W(2)-O(8)                                                 | 2.344(3)   |                             |            |
| average = 2.366 [2.344(3)-2.384(3)]                       |            |                             |            |
| P-O                                                       |            |                             |            |
| P(1)-O(3)                                                 | 1.562(6)   | P(1)-O(8)                   | 1.527(3)   |
| average = 1.545 [1.527(3)-1.562(6)]                       |            |                             |            |
| O-P-O                                                     |            |                             |            |
| O(3)-P(1)-O(8)                                            | 107.24(15) | O(8)-P(1)-O(8) <sup>i</sup> | 111.60(13) |
| average = 109.42 [107.24(15)-111.60(13)]                  |            |                             |            |

Symmetry operation:  $i = -y+3/2, -z+1, x-1/2$ ,  $ii = z+1/2, -x+3/2, -y+1$
